# Supplementary material for: Adsorption-Enhanced Ceramic Membrane Filtration Using Fenton Oxidation for Advanced Treatment of Refinery Wastewater: Treatment Efficiency and Membrane-Fouling Control
Source: MDPI journal article supplement (doi:10.3390/membranes11090651), 2021-08-25
Supplement: s1 [file s1]

**Fenton-Oxidation Adsorption-Enhanced Ceramic Membrane Filtration for Advanced  
Treatment of Refinery Wastewater: Treatment Efficiency and Membrane-Fouling Control**

Haotian Mu<sup>1</sup>, Qi Qiu<sup>3</sup>, Renzhen Cheng<sup>1</sup>, Liping Qiu<sup>1,2,\*</sup>, Kang Xie<sup>1,2</sup>, Mingchang Gao<sup>1</sup> and Guicai

Liu<sup>1,2,\*</sup>

- 1 School of Civil Engineering and Architecture, University of Jinan, Jinan 250022,  
China; muhaotian1997@163.com (H.M.); 18366105822@163.com (R.C.);  
cea\_xiek@ujn.edu.cn (K.X.); gaomc555@163.com (M.G.)
- 2 Research Center for Functional Material & Water Purification Engineering of  
Shandong Province, Jinan 250022, China
- 3 School of Water Conservancy and Environment, University of Jinan, Jinan 250022,  
China; [qiuqi\\_1994@163.com](mailto:qiuqi_1994@163.com)

\*Correspondence: lipingqiu@163.com (L.Q.); cea\_liugc@ujn.edu.cn (G.L.)

Submitted to

Membranes

August 25, 2021

\*To whom correspondence should be address.

[Tel: 13793189608](tel:13793189608) e-mail: lipingqiu@163.com; Tel: 18769707072 e-mail: cea\_liugc@ujn.edu.cn

## **List of Supplementary materials**

**Figure S1:** The structure of the membrane module.

**Figure S2:** Membrane resistance of CM in the operation of direct filtration and combined process: The membrane fouling resistance was calculated by equation (1-4).

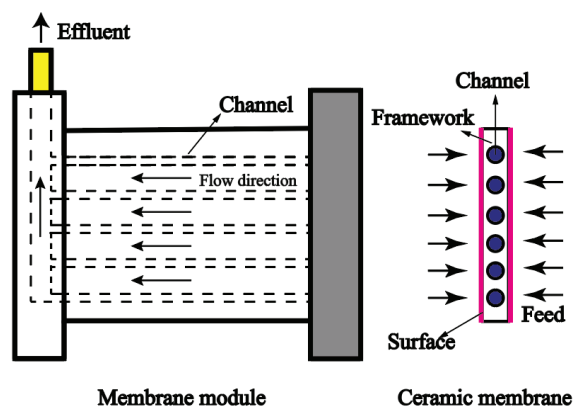

**Figure S1:** The structure of the membrane module.

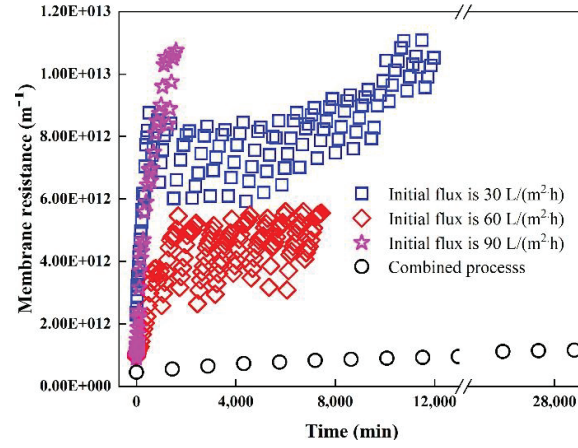

**Figure S2:** Membrane resistance of CM in the operation of direct filtration and combined process: The membrane fouling resistance was calculated by equation (1-4).
